# Supplementary material for: Brucella melitensis Wzm/Wzt System: Changes in the Bacterial Envelope Lead to Improved Rev1Δwzm Vaccine Properties
Source: PubMed Central journal article supplement (PMC9306315; doi:10.3389/fmicb.2022.908495), 2022-07-04
Supplement: Image_1.pdf [file Image_1.pdf]

**A Dose-response**

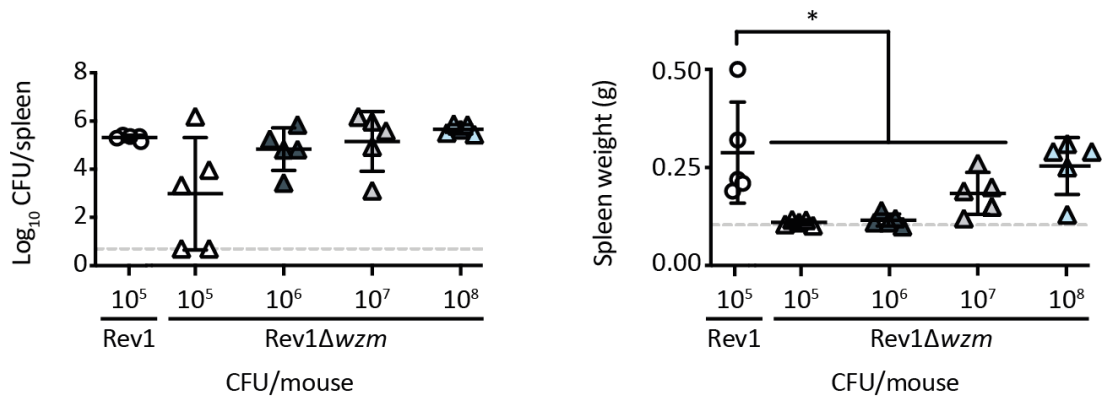

**B Splenic multiplication**

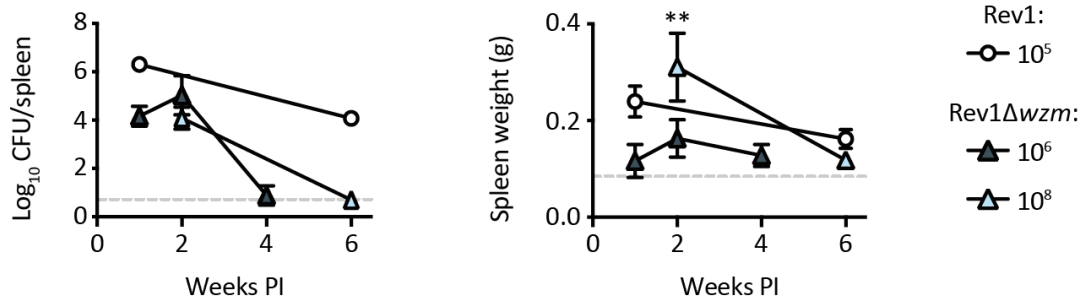

**Supplementary Figure 1.** Rev1 $\Delta$ wzm is highly attenuated in BALB/c mice and the splenomegaly induced is dose dependent. **(A)** Dose-infection response experiment at 2 weeks PI, and **(B)** spleen growth curves studies for 6 weeks PI. BALB/c mice were inoculated IP at the indicated dose of Rev1 $\Delta$ wzm or with  $10^5$  CFU/mouse of Rev1 as control and necropsied (n=5) at the indicated intervals to determine the mean $\pm$ SD of  $\log_{10}$  CFU/spleen and grams/spleen. Dashed lines indicate the detection limit and the normal weight of uninfected spleens (0.1 g). Statistical differences were determined by Fisher's LSD or t-tests: \*\*p $\leq$ 0.01, \*p $\leq$ 0.05.
