# Supplementary material for: Brucella melitensis Wzm/Wzt System: Changes in the Bacterial Envelope Lead to Improved Rev1Δwzm Vaccine Properties
Source: PubMed Central journal article supplement (PMC9306315; doi:10.3389/fmicb.2022.908495), 2022-07-04
Supplement: Image_2.pdf [file Image_2.pdf]

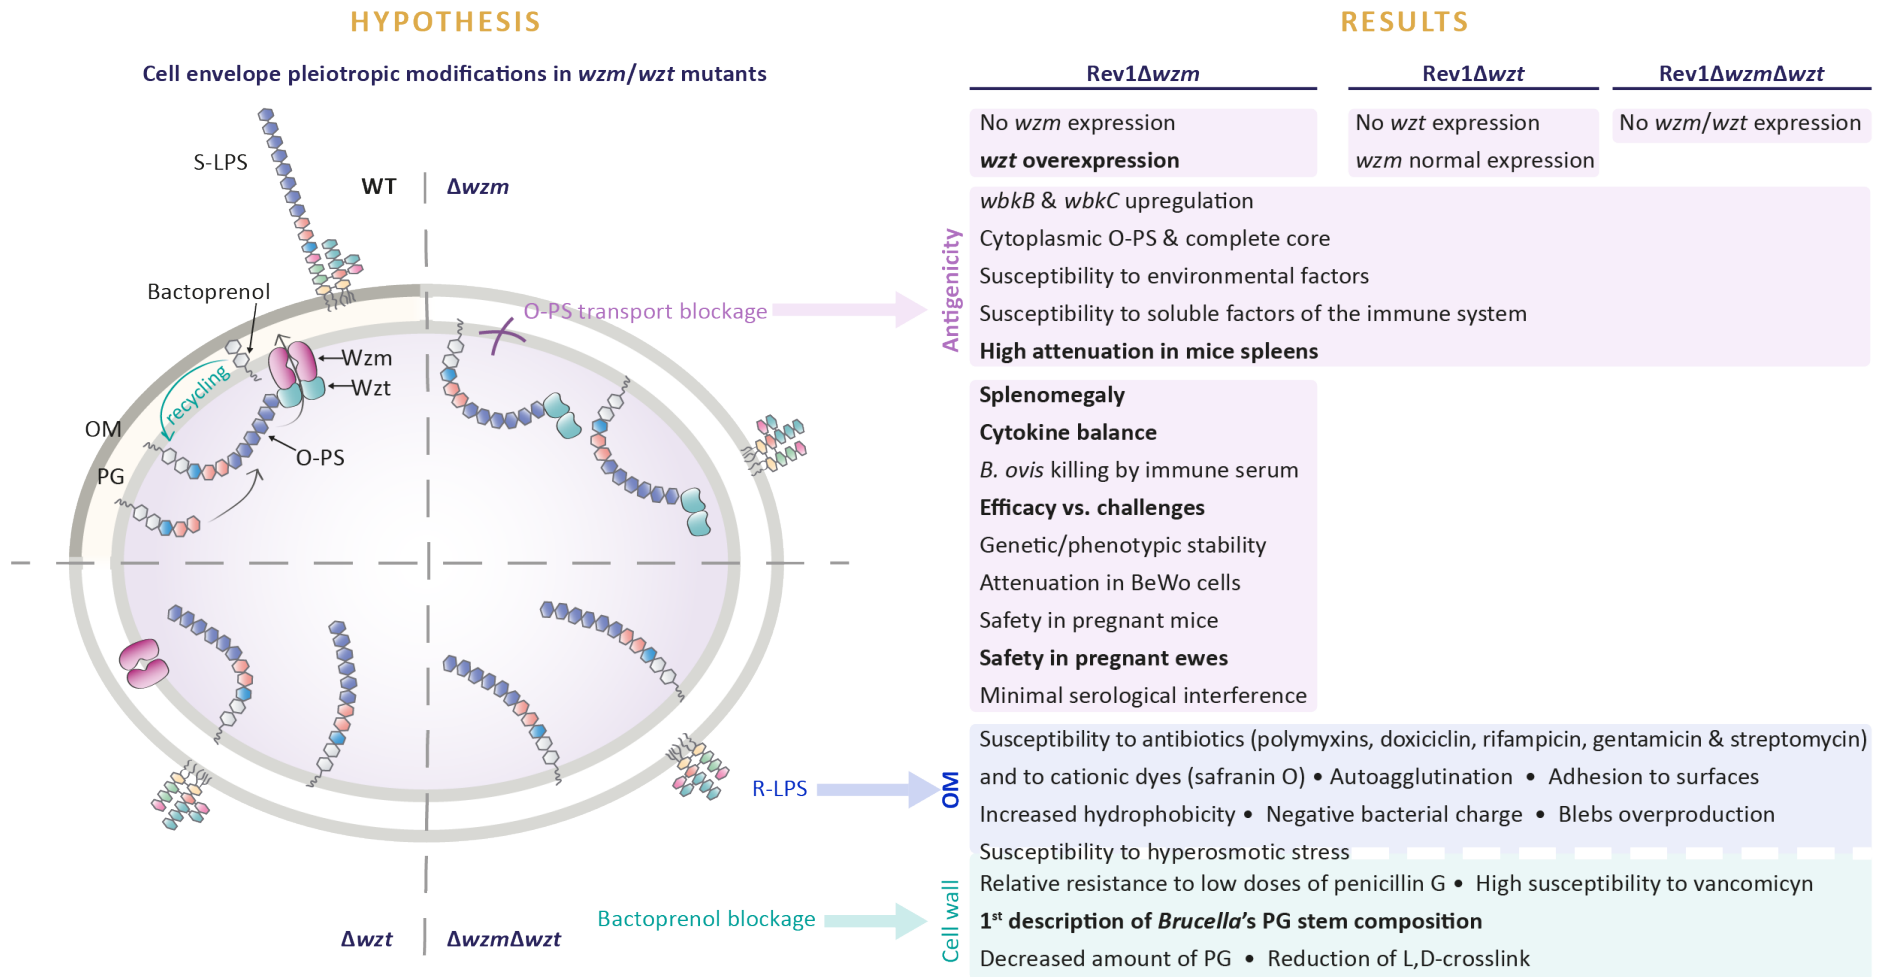

**Supplementary Figure 2.** Schematic representation of the starting hypothesis (left) and the main results obtained (right) concerning bacterial envelope changes associated with antigenicity, OM and cell wall in *Rev1 wzm/wzt* mutants.
