# Supplementary material for: Brucella melitensis Wzm/Wzt System: Changes in the Bacterial Envelope Lead to Improved Rev1Δwzm Vaccine Properties
Source: PubMed Central journal article supplement (PMC9306315; doi:10.3389/fmicb.2022.908495), 2022-07-04
Supplement: Table_1.pdf [file Table_1.pdf]

## SUPPLEMENTARY INFORMATION

**Supplementary Table 1. Bacterial strains used in this work**

| <i>Brucella</i>                                    | Description and characteristics                                                                                                                                                                  | Source/Reference       |
|----------------------------------------------------|--------------------------------------------------------------------------------------------------------------------------------------------------------------------------------------------------|------------------------|
| Rev1                                               | <i>B. melitensis</i> Rev1 reference vaccine parental; P <sub>5</sub> <sup>s</sup> , Str <sub>2.5</sub> <sup>r</sup> , S-LPS                                                                      | IdAB collection        |
| Rev1Δ <i>wzm</i>                                   | Rev1 in-frame deletion mutant in <i>wzm</i> (Δ27-241); R-LPS                                                                                                                                     |                        |
| Rev1Δ <i>wzt</i>                                   | Rev1 in-frame deletion mutant in <i>wzt</i> (Δ68-209); R-LPS                                                                                                                                     |                        |
| Rev1Δ <i>wzm</i> Δ <i>wzt</i>                      | Rev1 in-frame deletion mutant firstly in <i>wzm</i> , and secondly in <i>wzt</i> ; R-LPS                                                                                                         |                        |
| Rev1-NM                                            | Rev1 strains non-mutated after <i>wzm</i> or <i>wzt</i> allelic exchange; S-LPS                                                                                                                  | This work              |
| Rev1Δ <i>wzm</i> -NM                               | Rev1Δ <i>wzm</i> non-mutated strain after <i>wzt</i> allelic exchange during Rev1Δ <i>wzm</i> Δ <i>wzt</i> construction; R-LPS                                                                   |                        |
| Rev1Δ <i>wzm</i> -pSRK <i>wzm</i>                  | Rev1Δ <i>wzm</i> complemented with the non-integrative vector pSRK <i>wzm</i> ; Km <sub>50</sub> <sup>r</sup> , S-LPS                                                                            |                        |
| Rev1Δ <i>wzt</i> -pSRK <i>wzt</i>                  | Rev1Δ <i>wzt</i> complemented with the non-integrative vector pSRK <i>wzt</i> ; Km <sub>50</sub> <sup>r</sup> , S-LPS                                                                            |                        |
| Rev1Δ <i>wzm</i> Δ <i>wzt</i> -pSRK <i>wzm-wzt</i> | Rev1Δ <i>wzm</i> Δ <i>wzt</i> complemented with the non-integrative vector pSRK <i>wzm-wzt</i> ; Km <sub>50</sub> <sup>r</sup> , S-LPS                                                           |                        |
| 16M                                                | <i>B. melitensis</i> bv. 1 reference virulent strain; S-LPS                                                                                                                                      | IdAB collection        |
| 16MΔ <i>wzm</i>                                    | 16M in-frame deletion mutant in <i>wzm</i> ; R-LPS                                                                                                                                               | Zabalza-Baranguá, 2017 |
| BmH38 <i>manB</i> <sub>core</sub>                  | H38 carrying the mini-Tn5-Km in <i>manB</i> <sub>core</sub> (H38::Tn5- <i>manB</i> <sub>core</sub> ); Nal <sub>25</sub> <sup>r</sup> , Km <sub>50</sub> <sup>r</sup> , R-LPS and incomplete core | González et al., 2008  |
| H38::Gm                                            | <i>B. melitensis</i> bv. 1 carrying mini-Tn7- <i>gfp</i> -Gm; Nal <sub>25</sub> <sup>r</sup> , Gm <sub>15</sub> <sup>r</sup> , S-LPS                                                             |                        |
| BoPA                                               | <i>B. ovis</i> strain PA reference virulent strain; R-LPS                                                                                                                                        | IdAB collection        |
| BoPA::Gm                                           | BoPA strain carrying mini-Tn7- <i>gfp</i> -Gm; Nal <sub>25</sub> <sup>r</sup> , Gm <sub>15</sub> <sup>r</sup> , R-LPS                                                                            |                        |
| 2308                                               | <i>B. abortus</i> bv. 1 reference strain; S-LPS                                                                                                                                                  |                        |
| <i>E. coli</i> - plasmid constructions             | Description and characteristics                                                                                                                                                                  | Source/Reference       |
| S17λpir - pJQKmΔ <i>wzm</i>                        | Conjugative donor strain carrying BMEI1415 Δ27-241 into pJQKm suicide vector; <i>lac</i> , Km <sub>50</sub> <sup>r</sup> , Suc <sub>5</sub> <sup>s</sup>                                         | Zabalza-Baranguá, 2017 |
| S17λpir - pSRK <i>wzm</i>                          | Conjugative donor train with pSRK vector for Δ <i>wzm</i> mutant complementation; <i>lac</i> , Km <sub>50</sub> <sup>r</sup>                                                                     |                        |
| TOP10F' - pCR2.1Δ <i>wzt</i>                       | Competent strain carrying BMEI1416 Δ68-209 into pCR2.1 cloning vector; <i>lac</i> , Km <sub>50</sub> <sup>r</sup>                                                                                |                        |
| TOP10F'pJQKmΔ <i>wzt</i>                           | Competent strain carrying BMEI1416 Δ68-209 into pJQKm suicide vector; <i>lac</i> ; Km <sub>50</sub> <sup>r</sup> , Suc <sub>5</sub> <sup>s</sup>                                                 |                        |
| S17λpir - pJQKmΔ <i>wzt</i>                        | Conjugative donor strain carrying BMEI1416 Δ68-209 into pJQKm suicide vector; <i>lac</i> , Km <sub>50</sub> <sup>r</sup> , Suc <sub>5</sub> <sup>s</sup>                                         |                        |
| TOP10F'pCR2.1 <i>wzt</i>                           | Competent strain carrying BMEI1416 ORF into pCR2.1 cloning vector; <i>lac</i> ; Km <sub>50</sub> <sup>r</sup>                                                                                    | This work              |
| TOP10F'pSRK <i>wzt</i>                             | Competent strain carrying BMEI1416 ORF into pSRK vector; <i>lac</i> ; Km <sub>50</sub> <sup>r</sup>                                                                                              |                        |
| S17λpir - pSRK <i>wzt</i>                          | Conjugative donor strain with pSRK carrying BMEI1416 ORF for Δ <i>wzt</i> mutant complementation; <i>lac</i> , Km <sub>50</sub> <sup>r</sup>                                                     |                        |
| TOP10F'pCR2.1 <i>wzm-wzt</i>                       | Competent strain carrying BMEI1415-16 ORFs into pCR2.1 cloning vector; <i>lac</i> ; Km <sub>50</sub> <sup>r</sup>                                                                                |                        |
| TOP10F'pSRK <i>wzm-wzt</i>                         | Competent strain carrying BMEI1415-16 ORFs into pSRK vector; <i>lac</i> ; Km <sub>50</sub> <sup>r</sup>                                                                                          |                        |
| S17λpir - pSRK <i>wzm-wzt</i>                      | Conjugative strain with pSRK carrying BMEI1415-16 ORFs for Δ <i>wzm</i> Δ <i>wzt</i> mutant complementation; <i>lac</i> , Km <sub>50</sub> <sup>r</sup>                                          |                        |
| <i>E. coli</i> K12                                 | Reference Gram-negative laboratory strain, used as control in antimicrobial susceptibility studies                                                                                               | IdAB collection        |

LPS: lipopolysaccharide; S: smooth; R: rough; resistance to nalidixic acid (Nal<sub>25</sub><sup>r</sup>), kanamycin (Km<sub>50</sub><sup>r</sup>), streptomycin (Str<sub>2.5</sub><sup>r</sup>), gentamycin (Gm<sub>15</sub><sup>r</sup>) at the indicated dose (μg/mL); susceptibility to penicillin G (P<sub>5</sub><sup>s</sup>), sucrose (Suc<sub>5</sub><sup>s</sup>). *lac*: lactose operon.
