# Supplementary material for: Brucella melitensis Wzm/Wzt System: Changes in the Bacterial Envelope Lead to Improved Rev1Δwzm Vaccine Properties
Source: PubMed Central journal article supplement (PMC9306315; doi:10.3389/fmicb.2022.908495), 2022-07-04
Supplement: Table_2.pdf [file Table_2.pdf]

**Supplementary Table 2. Primers used for construction and genetic characterisation of *wzm/wzt* mutants**

| ORF (gene)              | Primer | Hybridizing region                   | Sequence (5'→3')                        | Source/Reference       |
|-------------------------|--------|--------------------------------------|-----------------------------------------|------------------------|
| BMEI1415 ( <i>wzm</i> ) | F1     | upstream                             | gcaaattgaaatggcagatg                    | Zabalza Baranguá, 2017 |
|                         | R2     | inner region                         | agcgcccacgtaaatcag                      |                        |
|                         | F3     | complementary to R2 + inner region   | ctgatttacgtggcgcttaacctgcgtggcagtagc    |                        |
|                         | R4     | downstream                           | atgaaacgtggcgtagtcc                     |                        |
|                         | F7     | start codon and upstream nucleotides | gtgagacgattcgtatgata                    | This work              |
|                         | F9     | start codon                          | atgatatcgatatggctaag                    |                        |
|                         | R8     | stop codon                           | tcataggtaaaaaatggctctc                  |                        |
|                         |        |                                      |                                         |                        |
| BMEI1416 ( <i>wzt</i> ) | F1     | upstream                             | gttcaggcagggtggattga                    | This work              |
|                         | R2     | inner region                         | tgtgacctatcagggcaacg                    |                        |
|                         | F3     | complementary to R2 + inner region   | cgttgcctgataggtcacacaagccatgaccttgcgaac |                        |
|                         | R4     | downstream                           | acagaagccggaatcgtagc                    |                        |
|                         | F6     | start codon                          | atgatccagccatcgattacc                   |                        |
|                         | R7     | stop codon                           | tcatgctatagctccattccc                   |                        |
|                         |        |                                      |                                         |                        |
| BMEI0993                | P1 (F) |                                      | caacatcgcaaagcctgaaa                    | Mancilla et al., 2013  |
| BMEI1013                | P2 (R) | GI-2 region                          | cgcaatccagccaatacctg                    |                        |
| BMEI0994                | P3 (R) |                                      | atcgtcggcattgtctctct                    |                        |
| BMEI1398                | P5 (F) |                                      | gatcttggatcggcctgtc                     |                        |
| BMEI1413                | P6 (R) | <i>wbk</i> region                    | tgcgactttctcagattg                      |                        |
| BMEI1400                | P7 (R) |                                      | cgctttaatatctcgcgttcc                   |                        |
|                         |        |                                      |                                         |                        |

F: forward; R: reverse. PCR amplification with F9-R8 *wzm*: 783 bp (WT and  $\Delta wzt$ ) or 141 bp ( $\Delta wzm$  and  $\Delta wzm\Delta wzt$ ); F6-R7 *wzt*: 759 bp (WT and  $\Delta wzm$ ) or 336 bp ( $\Delta wzt$  and  $\Delta wzm\Delta wzt$ ); and F7 *wzm*-R7 *wzt*: 1553 bp (WT), 911 bp ( $\Delta wzm$ ), 1130 bp ( $\Delta wzt$ ) or 488 bp ( $\Delta wzm\Delta wzt$ ).
