# Supplementary material for: Brucella melitensis Wzm/Wzt System: Changes in the Bacterial Envelope Lead to Improved Rev1Δwzm Vaccine Properties
Source: PubMed Central journal article supplement (PMC9306315; doi:10.3389/fmicb.2022.908495), 2022-07-04
Supplement: Table_3.pdf [file Table_3.pdf]

Supplementary Table 3. Sequencing and alignment of *wzm-wzt* from Rev1, Rev1Δ*wzm*, Rev1Δ*wzt* and Rev1Δ*wzm*Δ*wzt*

| Strain                        | Sequence (5'→3')                                                                                                        | bp  |
|-------------------------------|-------------------------------------------------------------------------------------------------------------------------|-----|
| Rev1                          | GTGAGACGATTTCTGATGATATCGTATATGGCTAATGCTGGAAAGGTACGCCACTTCTGGTGGCACCTTTCAATGCTGATTTACGTGGGCGCTTCAGGCGGTCTCTCTTGGGAATATTA | 120 |
| Rev1Δ <i>wzm</i>              | GTGAGACGATTTCTGATGATATCGTATATGGCTAATGCTGGAAAGGTACGCCACTTCTGGTGGCACCTTTCAATGCTGATTTACGTGGGCGCT-----                      | 94  |
| Rev1Δ <i>wzt</i>              | GTGAGACGATTTCTGATGATATCGTATATGGCTAATGCTGGAAAGGTACGCCACTTCTGGTGGCACCTTTCAATGCTGATTTACGTGGGCGCTTCAGGCGGTCTCTCTTGGGAATATTA | 120 |
| Rev1Δ <i>wzm</i> Δ <i>wzt</i> | GTGAGACGATTTCTGATGATATCGTATATGGCTAATGCTGGAAAGGTACGCCACTTCTGGTGGCACCTTTCAATGCTGATTTACGTGGGCGCT-----                      | 94  |
| Rev1                          | TGGGCAGTTATACAGCCACTAGCGCTCACGCTGCTACTGCTTTCTGTTTCTAAATTGTTGAATCAAAGTATATCTGCATATGCCCCCTATATTCTATCTGGGATTTATCTGGGAA     | 240 |
| Rev1Δ <i>wzm</i>              | -----                                                                                                                   | 95  |
| Rev1Δ <i>wzt</i>              | TGGGCAGTTATACAGCCACTAGCGCTCACGCTGCTACTGCTTTCTGTTTCTAAATTGTTGAATCAAAGTATATCTGCATATGCCCCCTATATTCTATCTGGGATTTATCTGGGAA     | 240 |
| Rev1Δ <i>wzm</i> Δ <i>wzt</i> | -----                                                                                                                   | 95  |
| Rev1                          | TACATATCATTTACAGTGGTTGGTGGCTCAACAGCGCTTGCAAGCCGATGCATATATAAAGCAAACCGAAATCCTCTTGCAATTTACACGTTAGGAACACTGTTTCTGGCTTGGTC    | 360 |
| Rev1Δ <i>wzm</i>              | -----                                                                                                                   | 95  |
| Rev1Δ <i>wzt</i>              | TACATATCATTTACAGTGGTTGGTGGCTCAACAGCGCTTGCAAGCCGATGCATATATAAAGCAAACCGAAATCCTCTTGCAATTTACACGTTAGGAACACTGTTTCTGGCTTGGTC    | 360 |
| Rev1Δ <i>wzm</i> Δ <i>wzt</i> | -----                                                                                                                   | 95  |
| Rev1                          | GTATTATCCGTAGCAAGTATCTCCCTATTCGGGTGGGTACTTATCATGTTTCTGAAAACCTCTCGCTTTCATGGTTAGCAATACCAACTTTGCTACCCATCCTTGCTTTGATAGTTTGG | 480 |
| Rev1Δ <i>wzm</i>              | -----                                                                                                                   | 95  |
| Rev1Δ <i>wzt</i>              | GTATTATCCGTAGCAAGTATCTCCCTATTCGGGTGGGTACTTATCATGTTTCTGAAAACCTCTCGCTTTCATGGTTAGCAATACCAACTTTGCTACCCATCCTTGCTTTGATAGTTTGG | 480 |
| Rev1Δ <i>wzm</i> Δ <i>wzt</i> | -----                                                                                                                   | 95  |
| Rev1                          | CCGCTTGCCACAATCGTCGGCTACATCGGCCAAGATTTGAGATCTGCCGAATGCTCTGGCGCTCGTGTACAGGCAGCTTGGTTTGTTCGCCGGTCTATTTTAAAGAATCGATGTTT    | 600 |
| Rev1Δ <i>wzm</i>              | -----                                                                                                                   | 95  |
| Rev1Δ <i>wzt</i>              | CCGCTTGCCACAATCGTCGGCTACATCGGCCAAGATTTGAGATCTGCCGAATGCTCTGGCGCTCGTGTACAGGCAGCTTGGTTTGTTCGCCGGTCTATTTTAAAGAATCGATGTTT    | 600 |
| Rev1Δ <i>wzm</i> Δ <i>wzt</i> | -----                                                                                                                   | 95  |
| Rev1                          | AGGCAGGGTGGATTGAATGCATTCGTTGATTATAACCCATTTACCACGTGATGCAGATTCTAAGAGCCCCTGTCTTTATGGGGAATGGCTACGGCTACCAATTACATTTGGTGCTTA   | 720 |
| Rev1Δ <i>wzm</i>              | -----                                                                                                                   | 95  |
| Rev1Δ <i>wzt</i>              | AGGCAGGGTGGATTGAATGCATTCGTTGATTATAACCCATTTACCACGTGATGCAGATTCTAAGAGCCCCTGTCTTTATGGGGAATGGCTACGGCTACCAATTACATTTGGTGCTTA   | 720 |
| Rev1Δ <i>wzm</i> Δ <i>wzt</i> | -----                                                                                                                   | 95  |
| Rev1                          | GGTGTGAGCCTCCTCTAACCTGCGTGGCAGTAGCTGTGGGGATGCGTGCGGAGAAGAGAGCCATTTTTTACCTATGATCCAGCCATCGATTACCTGTCAAATGTTTCATCTGCACTACG | 840 |
| Rev1Δ <i>wzm</i>              | -----TAACCTGCGTGGCAGTAGCTGTGGGGATGCGTGCGGAGAAGAGAGCCATTTTTTACCTATGATCCAGCCATCGATTACCTGTCAAATGTTTCATCTGCACTACG           | 198 |
| Rev1Δ <i>wzt</i>              | GGTGTGAGCCTCCTCTAACCTGCGTGGCAGTAGCTGTGGGGATGCGTGCGGAGAAGAGAGCCATTTTTTACCTATGATCCAGCCATCGATTACCTGTCAAATGTTTCATCTGCACTACG | 840 |
| Rev1Δ <i>wzm</i> Δ <i>wzt</i> | -----TAACCTGCGTGGCAGTAGCTGTGGGGATGCGTGCGGAGAAGAGAGCCATTTTTTACCTATGATCCAGCCATCGATTACCTGTCAAATGTTTCATCTGCACTACG           | 198 |

|              |                                                                                                                           |      |
|--------------|---------------------------------------------------------------------------------------------------------------------------|------|
| Rev1         | CTGCATCAGCGTTCAAAGAAGCGCTCAGTCAAACTCTAGTAAACGCCTTATTGAGTATGCGGCCGAGCGCAGGAGCAAACATTGAAGACATCCATGCCCTAAAGGGTATTTCTGTAGATA  | 960  |
| Rev1Δwzm     | CTGCATCAGCGTTCAAAGAAGCGCTCAGTCAAACTCTAGTAAACGCCTTATTGAGTATGCGGCCGAGCGCAGGAGCAAACATTGAAGACATCCATGCCCTAAAGGGTATTTCTGTAGATA  | 318  |
| Rev1Δwzt     | CTGCATCAGCGTTCAAAGAAGCGCTCAGTCAAACTCTAGTAAACGCCTTATTGAGTATGCGGCCGAGCGCAGGAGCAAACATTGAAGACATCCATGCCCTAAAGGGTATTTCTGTAGATA  | 960  |
| Rev1ΔwzmΔwzt | CTGCATCAGCGTTCAAAGAAGCGCTCAGTCAAACTCTAGTAAACGCCTTATTGAGTATGCGGCCGAGCGCAGGAGCAAACATTGAAGACATCCATGCCCTAAAGGGTATTTCTGTAGATA  | 318  |
| Rev1         | TAGCGCGGGGCGAACGCGTTGCCCTGATAGGTCAACAACGGGGCTGGCAAAGTACGTTCTTGAAAATATAGCCGGTCTCTACCCTATATCATCTGGGACATTAAGTACGCGGTACCG     | 1080 |
| Rev1Δwzm     | TAGCGCGGGGCGAACGCGTTGCCCTGATAGGTCAACAACGGGGCTGGCAAAGTACGTTCTTGAAAATATAGCCGGTCTCTACCCTATATCATCTGGGACATTAAGTACGCGGTACCG     | 438  |
| Rev1Δwzt     | TAGCGCGGGGCGAACGCGTTGCCCTGATAGGTCAACA-----                                                                                | 997  |
| Rev1ΔwzmΔwzt | TAGCGCGGGGCGAACGCGTTGCCCTGATAGGTCAACA-----                                                                                | 355  |
| Rev1         | TAAGATCCCTGTTTCGATATTGGTCTTGGGTTTGAGCCTGATGCAACTGGCCGTGAGAATATTTCTTACCCTGGGTTGCTTCTCGGACTAACGCCACGTTTCATGCGAGAGATCGAGGATG | 1200 |
| Rev1Δwzm     | TAAGATCCCTGTTTCGATATTGGTCTTGGGTTTGAGCCTGATGCAACTGGCCGTGAGAATATTTCTTACCCTGGGTTGCTTCTCGGACTAACGCCACGTTTCATGCGAGAGATCGAGGATG | 558  |
| Rev1Δwzt     | -----                                                                                                                     | 997  |
| Rev1ΔwzmΔwzt | -----                                                                                                                     | 355  |
| Rev1         | AGATCATCGAGTTCGCGGATCTCGGCGATTTTATCGATTATCCAATCAAACTTATTCTGCCGGCATGCAAGTTCGGCTCGCCTTCGCGATTTGACAGCAGTCGACGGCGACATACTCC    | 1320 |
| Rev1Δwzm     | AGATCATCGAGTTCGCGGATCTCGGCGATTTTATCGATTATCCAATCAAACTTATTCTGCCGGCATGCAAGTTCGGCTCGCCTTCGCGATTTGACAGCAGTCGACGGCGACATACTCC    | 678  |
| Rev1Δwzt     | -----                                                                                                                     | 997  |
| Rev1ΔwzmΔwzt | -----                                                                                                                     | 355  |
| Rev1         | TTCTAGACGAAGTTATAGGTGCAGGTGATGCCGCATTCATGACTAAGGCGAAGGCCCGCATAATGAATATGGTCGAGAAGGCTGAGTAATGGTTCTAGCAAGCCATGACCTTGCGAACG   | 1440 |
| Rev1Δwzm     | TTCTAGACGAAGTTATAGGTGCAGGTGATGCCGCATTCATGACTAAGGCGAAGGCCCGCATAATGAATATGGTCGAGAAGGCTGAGTAATGGTTCTAGCAAGCCATGACCTTGCGAACG   | 798  |
| Rev1Δwzt     | -----CAAGCCATGACCTTGCGAACG                                                                                                | 1017 |
| Rev1ΔwzmΔwzt | -----CAAGCCATGACCTTGCGAACG                                                                                                | 375  |
| Rev1         | TCCGTGAGCTTTGCACACGAGCATTGGTTTTCAAAGCCGGCACAATTGCATTTGATGGCAGGGTAGAAGACGCGATTTCTTCTATAACTCGGGAATGGGAGCTATAGCATGA          | 1553 |
| Rev1Δwzm     | TCCGTGAGCTTTGCACACGAGCATTGGTTTTCAAAGCCGGCACAATTGCATTTGATGGCAGGGTAGAAGACGCGATTTCTTCTATAACTCGGGAATGGGAGCTTTAACAATGA         | 911  |
| Rev1Δwzt     | TCCGTGAGCTTTGCACACGAGCATTGGTTTTCAAAGCCGGCACAATTGCATTTGATGGCAGGGTAGAAGACGCGATTTCTTCTATAACTCGGGAATGGGAGCTATAGCATGA          | 1130 |
| Rev1ΔwzmΔwzt | TCCGTGAGCTTTGCACACGAGCATTGGTTTTCAAAGCCGGCACAATTGCATTTGATGGCAGGGTAGAAGACGCGATTTCTTCTATAACTCGGGAATGGGAGCTATAGCATGA          | 488  |

Sequencing was performed with F7 *wzm* and R7 *wzt* pair of primers; ATG start and TGA stop codons are underlined.
