# Supplementary material for: Brucella melitensis Wzm/Wzt System: Changes in the Bacterial Envelope Lead to Improved Rev1Δwzm Vaccine Properties
Source: PubMed Central journal article supplement (PMC9306315; doi:10.3389/fmicb.2022.908495), 2022-07-04
Supplement: Table_4.pdf [file Table_4.pdf]

**Supplementary Table 4. Primers used for qPCR**

| Gene     | Sequence (5'→3') |                      | Source/Reference      |                           |
|----------|------------------|----------------------|-----------------------|---------------------------|
|          | Forward          | Reverse              |                       |                           |
| BMEI1671 | <i>IF-1</i>      | ttacggaactgctgeccaat | actagaacctgtcaccgge   |                           |
| BMEI1413 | <i>gmd</i>       | cagccgaggtggaaactctt | cagcaaattctcacgagccg  |                           |
| BMEI1414 | <i>per</i>       | caagtagctggattgccgc  | ggctctctgtgtccgagtt   |                           |
| BMEI1404 | <i>wbkA</i>      | gttgaaggagcgattccga  | gaagcgatctgcaagccaac  |                           |
| BMEI1417 | <i>wbkB</i>      | agattcaggcgctccaagac | acagaagccggaatcgtag   |                           |
| BMEI1418 | <i>wbkC</i>      | tcggtgcgtgggtgattat  | tgacttctctaaagcgagc   |                           |
| BMEI1427 | <i>wbkD</i>      | gacgcatgaagacatgacgc | gccagatcgcgattttcac   | This work                 |
| BMEI1393 | <i>wbkE</i>      | cacttggtctggacgagtct | cccatccccgacaatgaaa   |                           |
| BMEI1426 | <i>wbkF</i>      | ctgcaaaccttctgcccta  | gccgagtaatgcgataccca  |                           |
| BMEI0998 | <i>wboA</i>      | ggaaattgttcgggtctcg  | cgagcaaaagtccgtgtg    |                           |
| BMEI0997 | <i>wboB</i>      | aatggctttcttcgctcg   | cgataagagcggtgaaggct  |                           |
| BMEI1415 | <i>wzm</i>       | atgtctggaaggtacgccac | acgaaagacagtagcagcgt  |                           |
| BMEI1416 | <i>wzt</i>       | cctgataggtcacaacgggg | tcaggctcaaaccaagacc   |                           |
| BMEI1837 | <i>cgs</i>       | gccgatcagaaacaggcg   | ttcccactggtgccttgc    | Mirabella et al.,<br>2013 |
| BMEI0984 | <i>cgt</i>       | caatgttcggtggtgcaga  | tttcgaggttcttggcgtaac |                           |
