# Supplementary material for: Brucella melitensis Wzm/Wzt System: Changes in the Bacterial Envelope Lead to Improved Rev1Δwzm Vaccine Properties
Source: PubMed Central journal article supplement (PMC9306315; doi:10.3389/fmicb.2022.908495), 2022-07-04
Supplement: Table_5.pdf [file Table_5.pdf]

**Supplementary Table 5. Phenotyping of Rev1 *wzm/wzt* mutants by standard typing methods (Alton et al., 1989)**

| Strain                        | 10% CO <sub>2</sub> requirement | Catalase/oxidase/urease tests | Acriflavine agglutination/<br>crystal violet | Growth* with/without 10% CO <sub>2</sub> |                    |          |     |     |           |     |            |
|-------------------------------|---------------------------------|-------------------------------|----------------------------------------------|------------------------------------------|--------------------|----------|-----|-----|-----------|-----|------------|
|                               |                                 |                               |                                              | Antibiotics                              |                    | Thionine |     |     | Fuch sine |     | Safranin O |
|                               |                                 |                               |                                              | P <sub>5</sub>                           | Str <sub>2.5</sub> | 10       | 20  | 40  | 10        | 20  | 100        |
| Rev1                          | No                              | +/+/+                         | -/smooth                                     | -/-                                      | +/+                | +/+      | +/- | -/- | +/+       | +/+ | +/-        |
| Rev1Δ <i>wzm</i>              | No                              | +/+/+                         | +/rough                                      | -/-                                      | +/+                | +/+      | +/- | -/- | +/+       | +/+ | -/-        |
| Rev1Δ <i>wzt</i>              | No                              | +/+/+                         | +/rough                                      | -/-                                      | +/+                | +/+      | +/- | -/- | +/+       | +/+ | -/-        |
| Rev1Δ <i>wzm</i> Δ <i>wzt</i> | No                              | +/+/+                         | +/rough                                      | -/-                                      | +/+                | +/+      | +/- | -/- | +/+       | +/+ | -/-        |

+: positive reaction or growth; -: negative reaction or absence of growth. \* Growth in BAB with antibiotics or in BAB-S with dyes; P<sub>5</sub>: penicillin G 5 IU/mL; Str<sub>2.5</sub>: streptomycin 2.5 μg/mL; dyes in μg/mL.
