# Supplementary material for: Brucella melitensis Wzm/Wzt System: Changes in the Bacterial Envelope Lead to Improved Rev1Δwzm Vaccine Properties
Source: PubMed Central journal article supplement (PMC9306315; doi:10.3389/fmicb.2022.908495), 2022-07-04
Supplement: Table_6.pdf [file Table_6.pdf]

**Supplementary Table 6. Growth of Rev1 *wzm/wzt* mutants in presence of antibiotics and concentrations to which Rev1 is resistant**

| Atmosphere          | Medium                   | Number of CFU/100 $\mu$ L (mean $\pm$ SD; n=3) |                            |                            |                                              |
|---------------------|--------------------------|------------------------------------------------|----------------------------|----------------------------|----------------------------------------------|
|                     |                          | Rev1                                           | Rev1 $\Delta$ <i>wzm</i>   | Rev1 $\Delta$ <i>wzt</i>   | Rev1 $\Delta$ <i>wzm</i> $\Delta$ <i>wzt</i> |
| Normal              | BAB                      | 416 $\pm$ 54                                   | 247 $\pm$ 20               | 263 $\pm$ 37               | 216 $\pm$ 39                                 |
|                     | BAB-S                    | 415 $\pm$ 55                                   | 237 $\pm$ 22               | 247 $\pm$ 24               | 210 $\pm$ 30                                 |
|                     | BAB-PxB <sub>1.5</sub>   | 386 $\pm$ 34                                   | 1 $\pm$ 1 <sup>a</sup>     | 1.3 $\pm$ 1.5 <sup>a</sup> | 1 $\pm$ 1 <sup>a</sup>                       |
|                     | BAB-S-PxB <sub>1.5</sub> | 362 $\pm$ 17                                   | 9 $\pm$ 1 <sup>a</sup>     | 14 $\pm$ 5 <sup>a</sup>    | 11 $\pm$ 5 <sup>a</sup>                      |
|                     | BAB-Col <sub>4</sub>     | 358 $\pm$ 30                                   | 161 $\pm$ 21 <sup>a</sup>  | 152 $\pm$ 6 <sup>a</sup>   | 116 $\pm$ 3 <sup>a</sup>                     |
|                     | BAB-S-Col <sub>4</sub>   | 358 $\pm$ 30                                   | 85 $\pm$ 34 <sup>a</sup>   | 70 $\pm$ 33 <sup>a</sup>   | 37 $\pm$ 10 <sup>a</sup>                     |
|                     | BAB-Str <sub>2.5</sub>   | 349 $\pm$ 33                                   | 74 $\pm$ 10 <sup>a</sup>   | 94 $\pm$ 10 <sup>a</sup>   | 16 $\pm$ 11 <sup>a</sup>                     |
|                     | BAB-S-Str <sub>2.5</sub> | 377 $\pm$ 52                                   | 223 $\pm$ 6                | 204 $\pm$ 7                | 186 $\pm$ 11                                 |
| 10% CO <sub>2</sub> | BAB                      | 386 $\pm$ 28                                   | 238 $\pm$ 17               | 257 $\pm$ 34               | 208 $\pm$ 41                                 |
|                     | BAB-S                    | 390 $\pm$ 38                                   | 228 $\pm$ 36               | 239 $\pm$ 8                | 198 $\pm$ 16                                 |
|                     | BAB-PxB <sub>1.5</sub>   | 256 $\pm$ 19 <sup>a</sup>                      | 0 <sup>a</sup>             | 1 $\pm$ 1 <sup>a</sup>     | 0 <sup>a</sup>                               |
|                     | BAB-S-PxB <sub>1.5</sub> | 256 $\pm$ 19 <sup>a</sup>                      | 0 <sup>a</sup>             | 1 $\pm$ 1 <sup>a</sup>     | 0 <sup>a</sup>                               |
|                     | BAB-Col <sub>4</sub>     | 267 $\pm$ 21 <sup>a</sup>                      | 8 $\pm$ 2 <sup>a</sup>     | 4 $\pm$ 3 <sup>a</sup>     | 2 $\pm$ 0 <sup>a</sup>                       |
|                     | BAB-S-Col <sub>4</sub>   | 314 $\pm$ 50 <sup>a</sup>                      | 1.3 $\pm$ 1.5 <sup>a</sup> | 3 $\pm$ 1 <sup>a</sup>     | 3 $\pm$ 1 <sup>a</sup>                       |
|                     | BAB-Str <sub>2.5</sub>   | 309 $\pm$ 67                                   | 170 $\pm$ 22 <sup>a</sup>  | 171 $\pm$ 10 <sup>a</sup>  | 167 $\pm$ 13 <sup>a</sup>                    |
|                     | BAB-S-Str <sub>2.5</sub> | 264 $\pm$ 21 <sup>a</sup>                      | 104 $\pm$ 7 <sup>a</sup>   | 104 $\pm$ 9 <sup>a</sup>   | 87 $\pm$ 8 <sup>a</sup>                      |

BAB: Blood Agar Base No. 2 plates; S: 5% calf serum supplement; PxB<sub>1.5</sub>: polymyxin B 1.5  $\mu$ g/mL; Col<sub>4</sub>: colistin 4  $\mu$ g/mL; Str<sub>2.5</sub>: streptomycin 2.5  $\mu$ g/mL. Fisher's LSD test: <sup>a</sup>p $\leq$ 0.01 vs. growth in BAB plates incubated in normal atmosphere (shaded in grey).
