# Supplementary material for: Brucella melitensis Wzm/Wzt System: Changes in the Bacterial Envelope Lead to Improved Rev1Δwzm Vaccine Properties
Source: PubMed Central journal article supplement (PMC9306315; doi:10.3389/fmicb.2022.908495), 2022-07-04
Supplement: Table_7.pdf [file Table_7.pdf]

**Supplementary Table 7. Susceptibility to the antimicrobials recommended for human brucellosis treatment**

| Strain             | MIC/ MBC <sub>90</sub> (µg/mL) |          |           |         | Bacterial survival (mean %) in solid medium (µg/mL) |                    |                     |                    |                                        |                                          |                                         |
|--------------------|--------------------------------|----------|-----------|---------|-----------------------------------------------------|--------------------|---------------------|--------------------|----------------------------------------|------------------------------------------|-----------------------------------------|
|                    | Dx                             | Rf       | Gm        | Str     | Dx <sub>0.02</sub>                                  | Rf <sub>0.4</sub>  | Gm <sub>0.125</sub> | Str <sub>2.5</sub> | Dx <sub>0.02</sub> + Rf <sub>0.4</sub> | Dx <sub>0.02</sub> + Gm <sub>0.125</sub> | Dx <sub>0.02</sub> + Str <sub>2.5</sub> |
| Rev1               | 0.025/0.1                      | 0.50/1.0 | 0.25/0.25 | 15/>15  | 62.8%                                               | 59.0%              | 82.9%               | 89.8%              | 11.7%                                  | 66.3%                                    | 55.0%                                   |
| Rev1Δwzm           | 0.025/0.1                      | 0.25/1.0 | 0.25/0.25 | 3.8/7.5 | 54.2%                                               | 38.8% <sup>a</sup> | 59.2% <sup>a</sup>  | 37.7% <sup>a</sup> | 8.6%                                   | 21.2% <sup>a</sup>                       | 0.4% <sup>ab</sup>                      |
| Rev1Δwzt           | 0.025/0.1                      | 0.25/1.0 | 0.25/0.25 | 3.8/7.5 | 56.5%                                               | 39.6% <sup>a</sup> | 60.0% <sup>a</sup>  | 39.7% <sup>a</sup> | 7.8%                                   | 22.8% <sup>a</sup>                       | 0.5% <sup>ab</sup>                      |
| Rev1ΔwzmΔwzt       | 0.025/0.1                      | 0.25/1.0 | 0.25/0.25 | 3.8/7.5 | 54.7%                                               | 40.9% <sup>a</sup> | 61.1% <sup>a</sup>  | 41.9% <sup>a</sup> | 9.0%                                   | 23.7% <sup>a</sup>                       | 0.4% <sup>ab</sup>                      |
| <i>E. coli</i> K12 | 1.6/3.2                        | >16/>16  | 0.25/0.50 | 15/>15  | ND                                                  | ND                 | ND                  | ND                 | ND                                     | ND                                       | ND                                      |

MIC: minimum inhibitory concentration preventing visible bacterial growth; MBC<sub>90</sub>: minimum bactericidal concentration killing 90% of bacteria. Dx: doxycycline; Rf: rifampicin; Gm: gentamicin; Str: streptomycin. Each experiment was performed by triplicate. ND: not determined; Fisher's LSD test: <sup>a</sup>p≤0.001 vs. Rev1, <sup>b</sup>p≤0.05 vs. the other treatments
